# Supplementary material
Source: publisher figshare collection journal article supplement (https://acs.figshare.com/ndownloader/files/22082559)
Supplement: Supplementary file 1 [file 22082559]

## Supporting information

# SO<sub>2</sub> electrocatalytic oxidation properties of Pt-Ru/C bimetallic catalysts with different nanostructures

Biyi Huang, Yong He\*, Yanqun Zhu, Zhihua Wang, Kefa Cen

State Key Laboratory of Clean Energy Utilization,

Zhejiang University, Hangzhou 310027, P. R. China

\*Corresponding author: heyong@zju.edu.cn

|                   |   |
|-------------------|---|
| Number of pages:  | 9 |
| Number of figures | 6 |
| Number of tables: | 3 |

## **Experimental details**

### **1. Pretreatment of carbon carrier**

A certain amount of carbon black (Carbot Corp., XC-72, BET: 237 m<sup>2</sup>/g, CB for short) was weighed and placed in a beaker. Then acetone solution was added, which was about twice the volume of CB, stirred and ultrasonic for 3 h at room temperature. After filtration and washing with deionized water, the filter cake was vacuum-dried at room temperature. The dried sample was placed in a mixture of 10% HNO<sub>3</sub> and 30% H<sub>2</sub>O<sub>2</sub> (volume ratio of HNO<sub>3</sub>:H<sub>2</sub>O<sub>2</sub> was 2:1) and reflux for 5 h at 60 °C. Filter the sample with deionized water until neutral, then vacuum drying at room temperature.

### **2. Synthesis of Pt/C, Ru/C, PtRu/C and Ru@Pt/C catalysts**

The preparation method of Ru@Pt/C shell-core catalyst is as follows. First, Ru nucleus was synthesized on CB support: RuCl<sub>2</sub>/EG (0.1 mol/L) solution was mixed with sodium citrate in 25 ml EG with ultrasonic treatment. 10 mg CB support was added in above mixture and ultrasonic for 30 min to form a uniform slurry. Adjusting the mixture to about 10 with 1 M KOH/EG solution and then processing it with a microwave oven (G70F20CN1L-DG(B0), 700 W, Galanz) in heating mode of stopping 10 s for every 60 s, repeated twice. After cooling to room temperature, 10% HNO<sub>3</sub> was added to modulate the pH to below 3. The sample was washed with deionized water until no chloride ions were present in the filtrate and then vacuumized to dry at room temperature. Pt shells are then prepared on Ru cores in the same way, with microwave

treatment of 90 s in a heating mode of stopping 10 s for every 30 s. Because of the large surface energy of Ru nucleus, Pt salt will be nucleated and reduced on Ru nucleus first [1]. The low reduction temperature causes the Pt precursor to deposit on the Ru nanonucleus, avoiding the formation of single metal Pt nanoparticles [2]. The preparation method of Pt/C and PtRu alloy catalysts was the same as above. A certain amount of CB powder, sodium citrate and chloroplatinic acid (or the mixture of chloroplatinic acid and  $\text{RuCl}_2$ ) were mixed evenly in ethylene glycol solution with ultrasonic treatment, and the PH was adjusted to 10 with KOH and then placed in microwave oven for 120 s, stopping 10 s for every 60 s. The total load of the metal was 50%, and the molar ratio of Pt/Ru in the bimetallic catalyst was 1:1. Commercial 50% Pt/C catalyst (Johnson Matthey Corp) was used for comparison.

### **3. Structure characterization of the catalysts**

Transmission electron microscopy (TEM, FEI Tecnai G2 F20 S-TWIN) was used to determine the morphology and microstructure of the as-prepared catalyst, carried out at an accelerating voltage of 200 kV. X-ray diffraction (XRD) patterns were obtained on an X-ray diffractometer (XRD, X-pert Powder) using Cu-K $\alpha$  radiation in the  $2\theta$  range of  $10^\circ$ - $80^\circ$ . The surface structure and composition of the catalysts were characterized by X-ray photo-electron spectroscopy (XPS, VG ESCALAB) with a monochromic Cu-K source ( $\lambda = 0.15406 \text{ nm}$ ). The metal loading of Pt/RGO and Pt/C were analyzed by Inductively Coupled Plasma-Atomic Emission Spectrometry (ICP-AES, Thermo icap 6300).

#### 4. Electrochemical measurement of the catalysts

Electrochemical measurements of the catalysts were carried out on three-electrode cell by a potentiostat (AUTOLAB PGSTAT302N, Metrohm Technology Ltd.). Figure S1 shows the electrochemical measurement facility. The working electrode was a glassy carbon (GC) electrode of 5 mm in diameter. 15  $\mu\text{L}$  of the catalyst slurry was applied to the pre-polished GC electrode and allowing it to air dry. The catalyst slurry was obtained by mixing the catalysts (2 mg), Nafion aqueous solution (25  $\mu\text{L}$ ) and DI water (10  $\mu\text{L}$ ) in isopropyl alcohol (435  $\mu\text{L}$ ), followed by sonication for 30 min. An Ag/AgCl electrode was used as reference electrode and a spring-shaped Pt wire with diameter of 1 mm were used as the counter electrode. Prior to any electrochemical measurements, the working electrode was cyclic voltammetric treated at a potential range of 0-1.3 V at a scan rate of 50 mV/s to activate the catalyst. The catalytic activity of the catalysts for  $\text{SO}_2$  oxidation in high acid environment was determined by cyclic voltammetry (CV), linear sweep voltammetry (LSV), electrochemical impedance spectroscopy (EIS) measurements. The electrolyte used in the experiment was 13 mol/kg<sub>H<sub>2</sub>O</sub>  $\text{H}_2\text{SO}_4$  solutions saturated with  $\text{SO}_2$  which was determined by our previous studies [3].  $\text{SO}_2$  gas was fed into the electrolyte at a flow rate of 15 ml/min for 3 h before the experiment and continued to supply during the experiment to ensure  $\text{SO}_2$  saturation. The CV test was measured in a scan range of 0.4-1.3 V with scan rate of 50 mV/s. The EIS test was conducted at 0.6 V, with the amplitude and frequency of the sinusoidal disturbance signal being 10 mV and 10 kHz-10 mHz, respectively. The electrochemical active surface area (*ECSA*) of the catalyst was obtained by cyclic

voltammetric investigation in 0.5 M sulfuric acid solution with scanning range of 0-1.2 V and scan rate of 50 mV/s. All the experiments were conducted at 20 °C and all the potentials shown in this paper were converted to the reversible hydrogen electrode (RHE) scale.

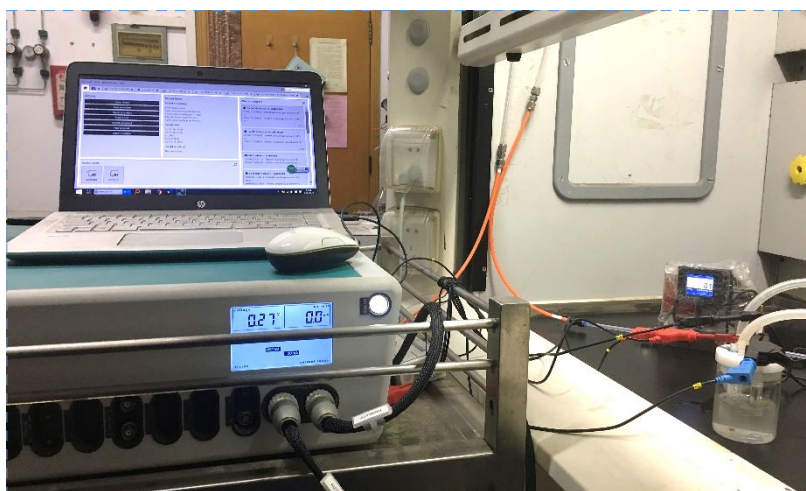

**Figure S1.** The picture of electrochemical measurement facility.

## Figures

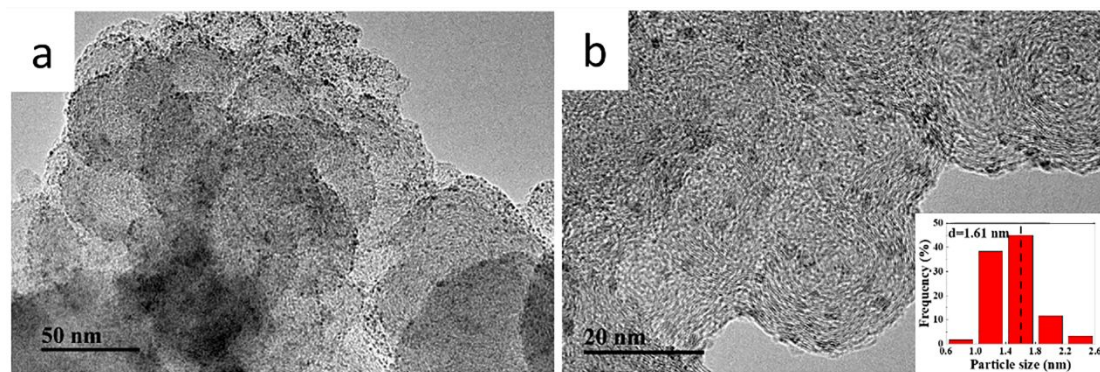

**Figure S2.** TEM pictures of Ru<sub>core</sub>/C with scale of (a) 50 nm and (b) 20 nm, and the inset is size distribution of Ru.

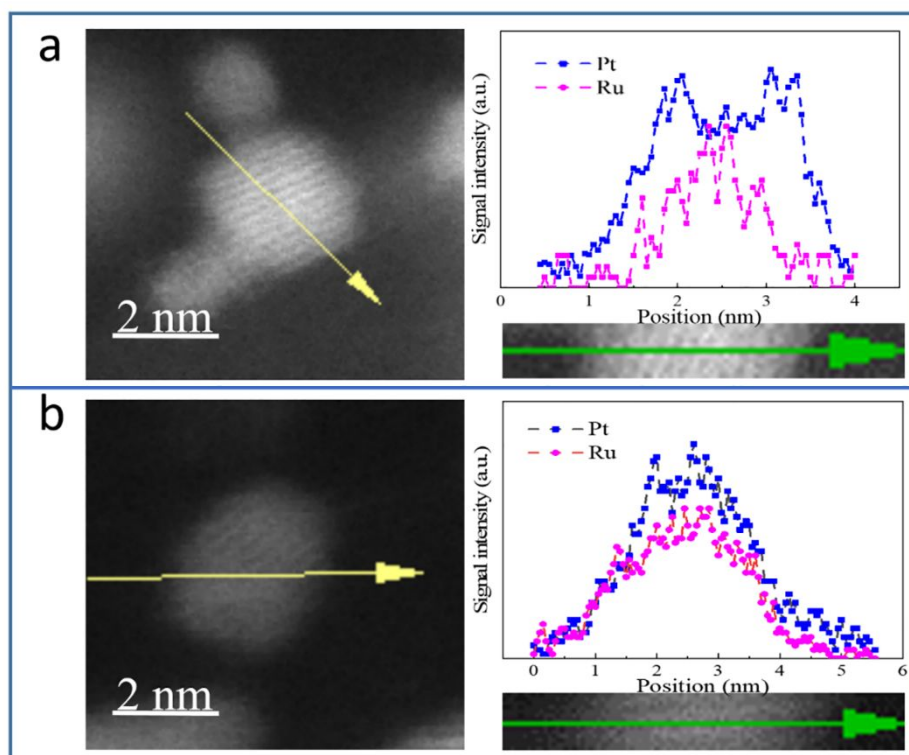

**Figure S3.** HAADF-STEM (left) and EDX line-scan (right) of (a) Ru@Pt/C and (b) PtRu/C

samples.

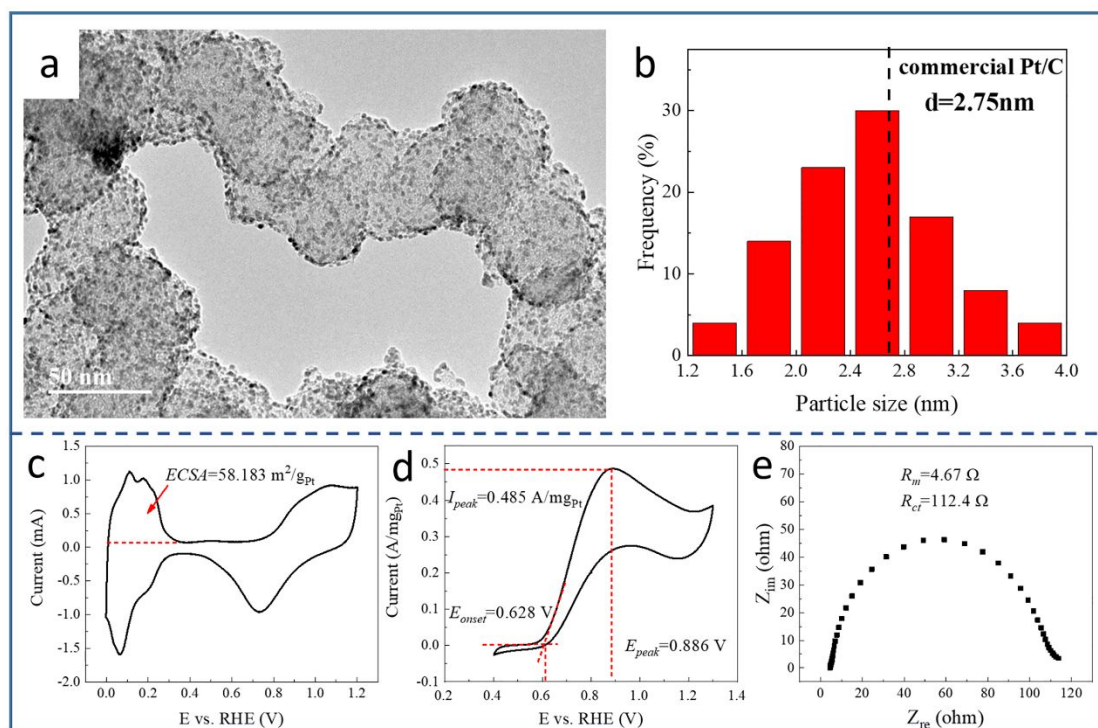

**Figure S4.** (a) TEM pictures, (b) particle size distribution, (c) ECSA measurement, (d) CV curve of SO<sub>2</sub>OR and (e) Nyquist graph of commercial Pt/C catalyst.

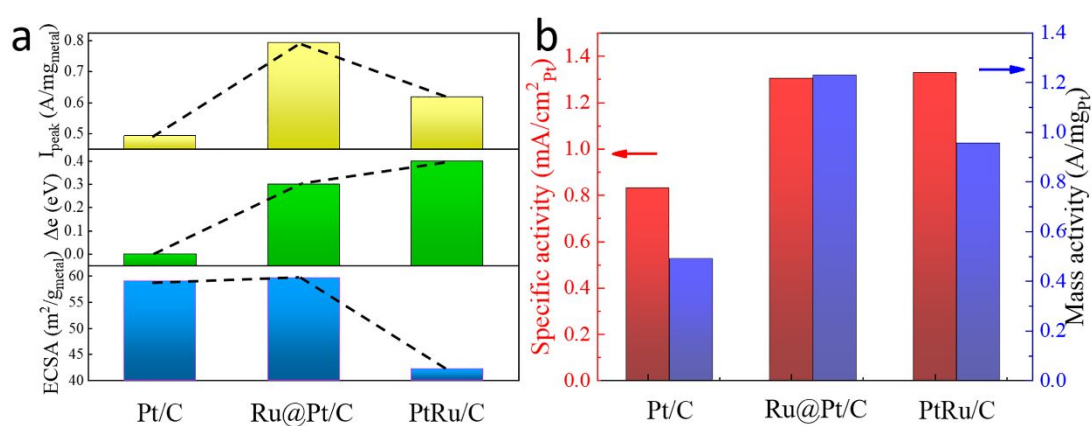

**Figure S5.** (a) Relationship between influencing factors and catalytic activity; (b) activity comparison among the samples.



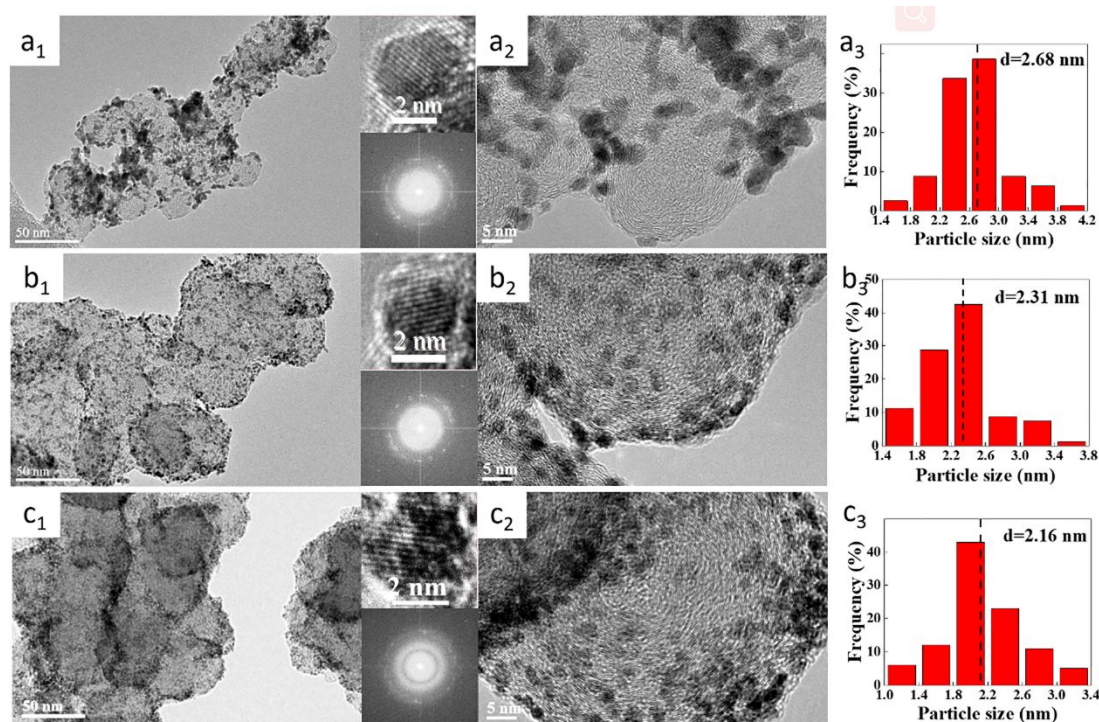

**Figure S6.** TEM characterization of (a) Pt/C, (b) Ru@Pt/C and (c) PtRu/C catalysts after stability test, left: scale of 50 nm, middle: scale of 5 nm, and right: particle size distribution.

## Tables

**Table S1.** Content of Pt and Ru in catalysts evaluated by ICP-AES and EDX.

| Catalyst | Ru/Pt mass   | Metal loading | Ru/Pt mass   | Metal loading |
|----------|--------------|---------------|--------------|---------------|
|          | ratio by ICP | by ICP        | ratio by EDX | by EDX        |
| Pt/C     | 0:100        | 53.5          | 0:100        | 53.2          |



|         |       |      |       |      |
|---------|-------|------|-------|------|
| Ru@Pt/C | 33:67 | 47.2 | 37:63 | 46.6 |
| PtRu/C  | 44:56 | 48.6 | 43:57 | 45.3 |

**Table S2.** XPS analysis data of peak attribution, position and element abundance.

| Attribution | Pt 4f <sub>5/2</sub> | Pt 4f <sub>7/2</sub> | Pt <sup>2+</sup> | Pt <sup>2+</sup> | Ru     | RuO <sub>2</sub> | RuO <sub>x</sub> H <sub>y</sub> |
|-------------|----------------------|----------------------|------------------|------------------|--------|------------------|---------------------------------|
| Pt/C        | 74.61                | 71.41                | 76.23            | 72.51            |        |                  |                                 |
|             | 36.34%               | 24.64%               | 26.55%           | 12.47%           |        |                  |                                 |
| Ru@Pt/C     | 75.03                | 71.72                | 76.88            | 73.35            | 460.75 | 462.71           | 465.24                          |
|             | 35.77%               | 30.13%               | 17.71%           | 16.39%           | 41.55% | 28.79%           | 29.66%                          |
| PtRu/C      | 75.10                | 71.81                | 76.73            | 73.22            | 459.78 | 461.21           | 463.6                           |
|             | 36.11%               | 22.91%               | 25.80%           | 15.18%           | 49.02% | 22.91%           | 28.07%                          |
| Ru/C        | -                    | -                    | -                | -                | 459.3  | 461.44           | 463.78                          |
|             | -                    | -                    | -                | -                | 50.13% | 34.64%           | 15.23%                          |

**Table S3.** Impedance value obtained by fitting with the equivalent circuit

| Catalyst | $R_m$ ( $\Omega$ ) | $R_{ct}$ ( $\Omega$ ) |
|----------|--------------------|-----------------------|
| Pt/C     | 4.67               | 114.6                 |
| Ru@Pt/C  | 4.64               | 40.26                 |
| PtRu/C   | 4.65               | 74.69                 |

## REFERENCE

- (1) Hu, Y., Zhu, A., Zhang, Q., and Liu, Q., Fabrication of hollow platinum-ruthenium core-shell catalysts with nanochannels and enhanced performance for methanol oxidation. *Journal of Power Sources* **2015**, 299, 443-450.
- (2) Nilekar, A., Alayoglu, S., Eichhorn, B., and Mavrikakis, M., Preferential CO Oxidation in Hydrogen: Reactivity of Core-Shell Nanoparticles. *Journal of the American Chemical Society* **2010**, 132(21), 7418-7428.
- (3) Ying, Z., Zhang, Y., Zhu, Q., Peng, P., Wang, Z., Zhou, J., Liu, J., and Cen, K., Electrochemical investigation of the Bunsen reaction in the sulfur-iodine cycle. *International Journal of Hydrogen Energy* **2013**, 38(34), 14391-14401.
